# Supplementary material
Source: PubMed Central journal article supplement (PMC6811441)
Supplement: AAC.01454-19-s0001.pdf [file AAC.01454-19-s0001.pdf]

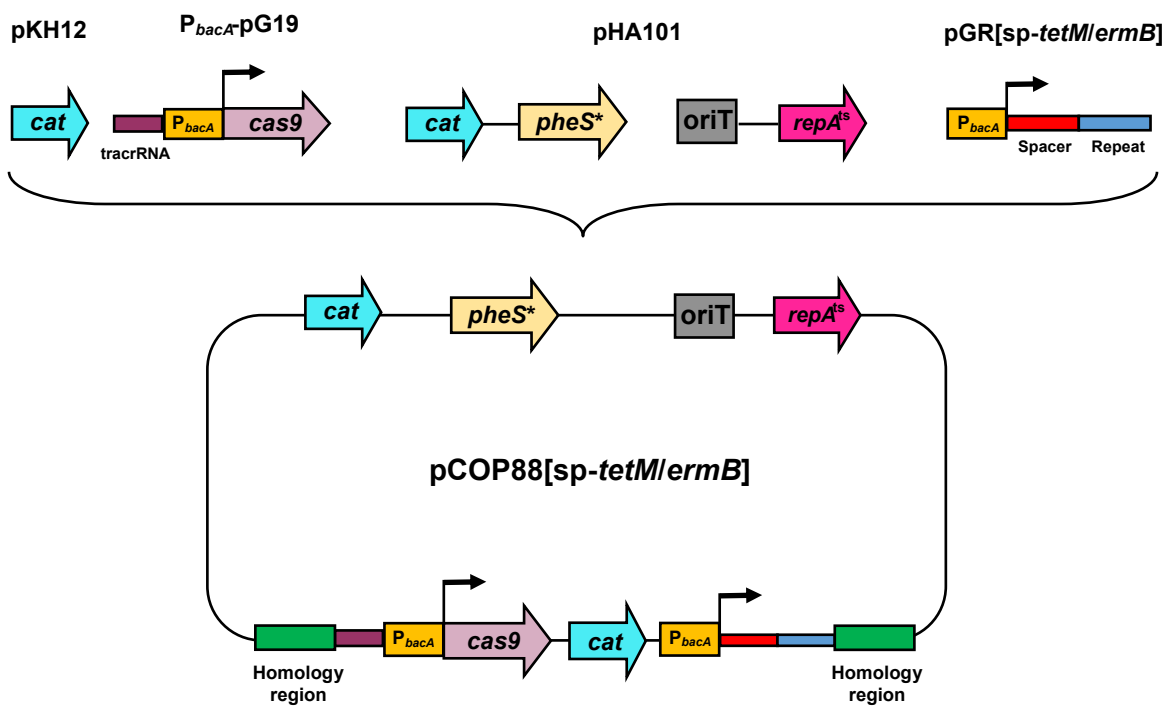

Figure S1

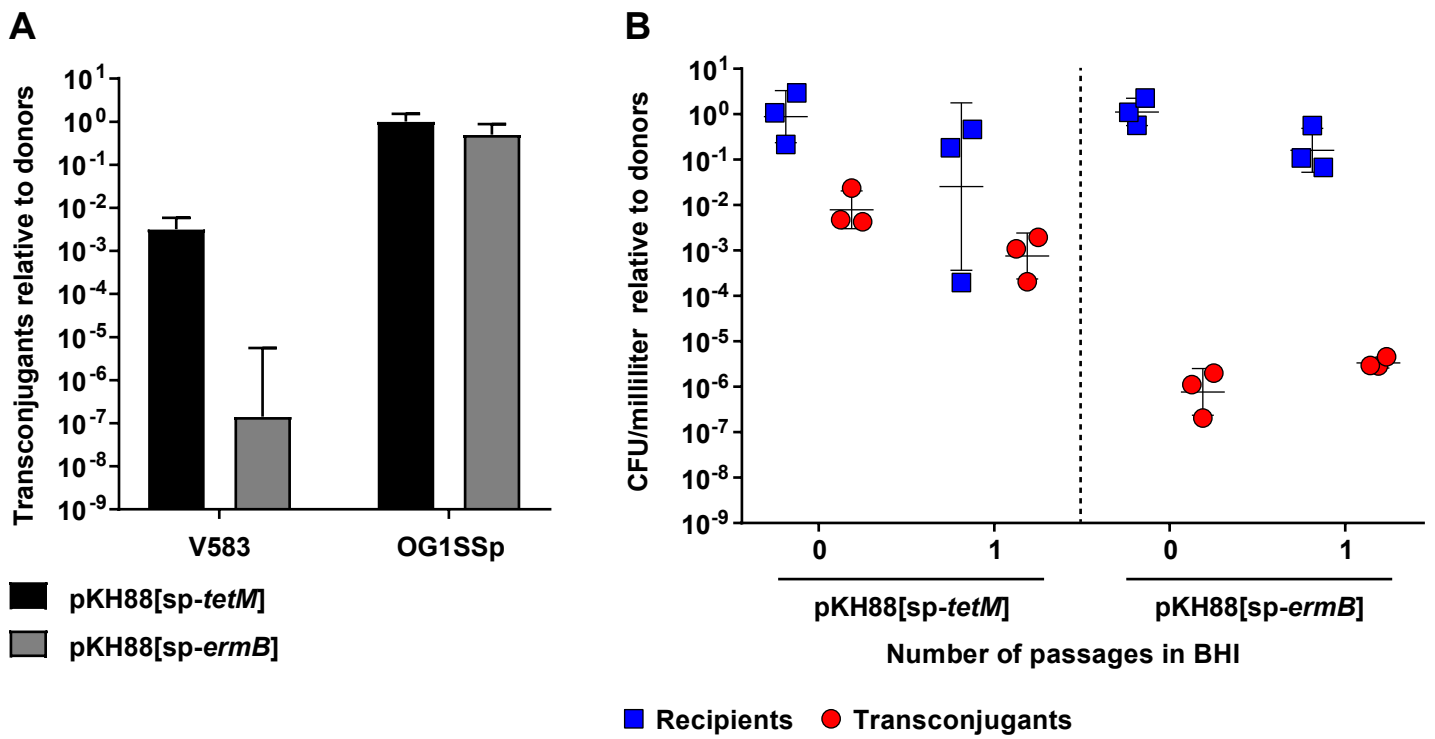

Figure S2

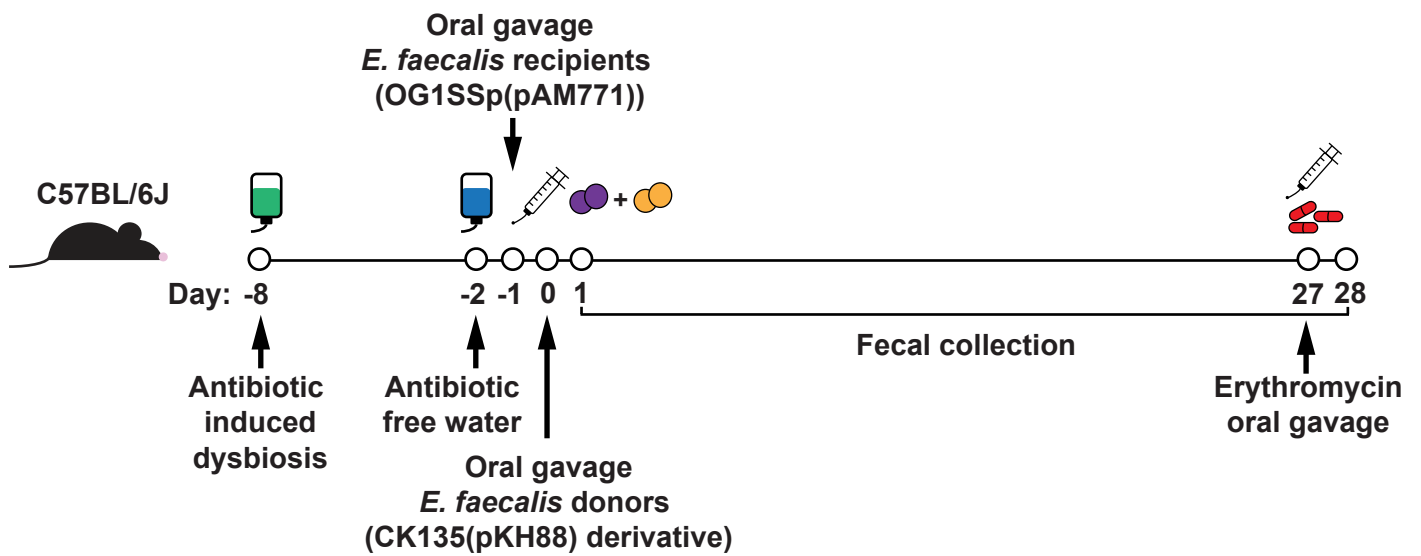

Figure S3

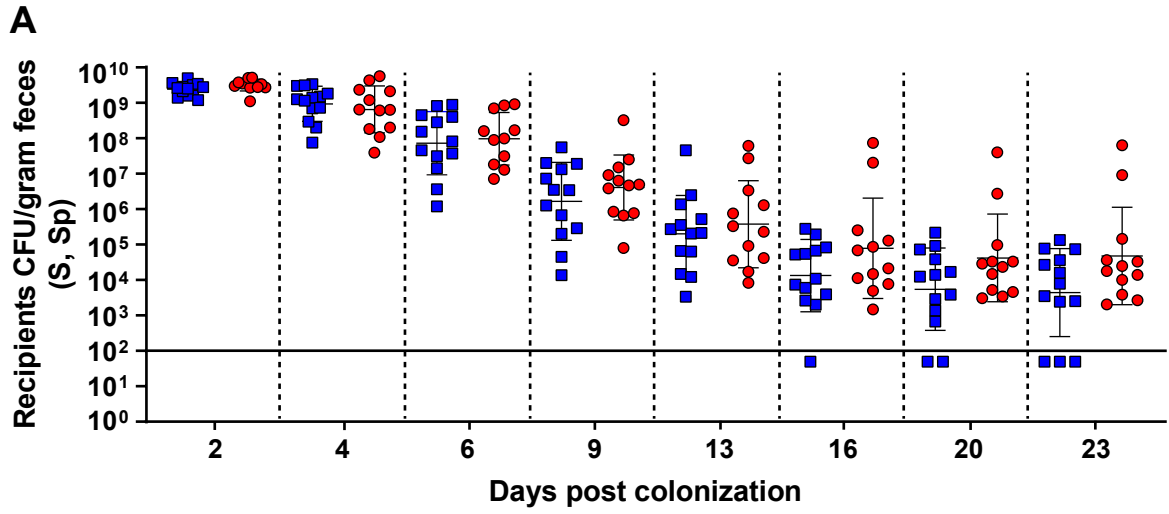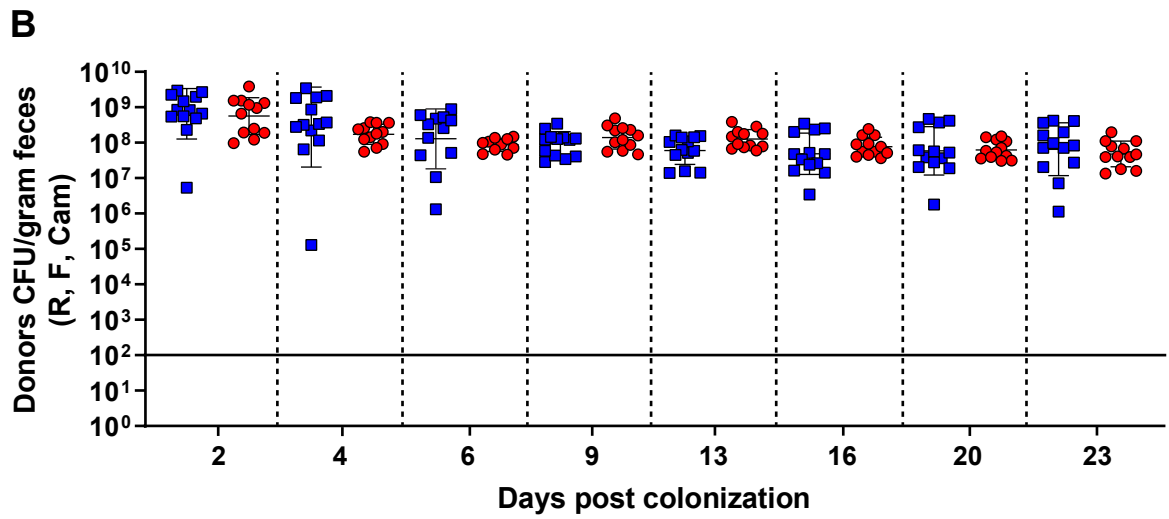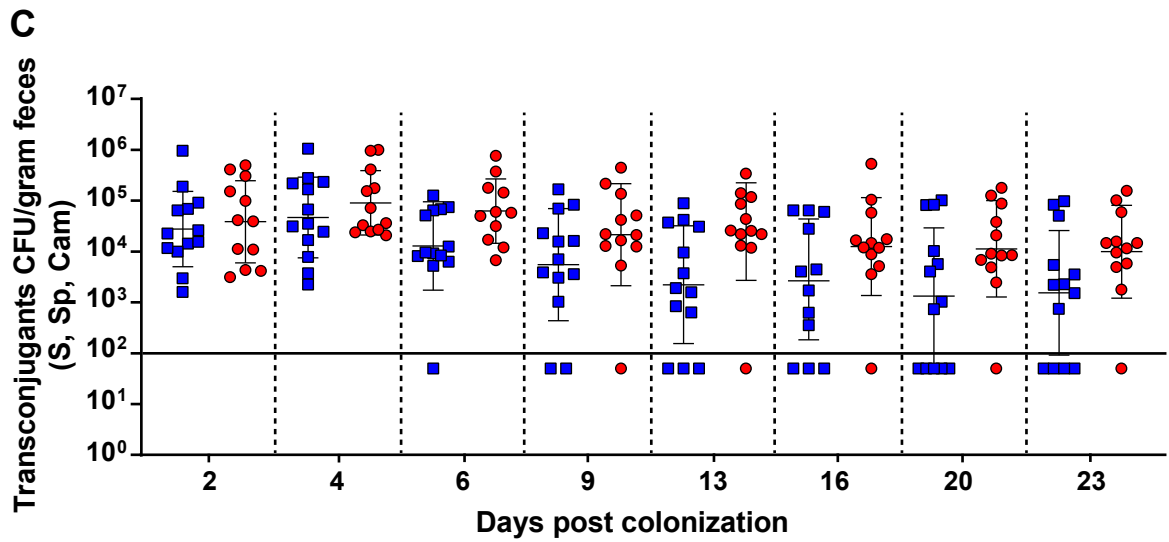

■ pKH88[sp-ermB] ● pKH88[sp-tetM]

Figure S4

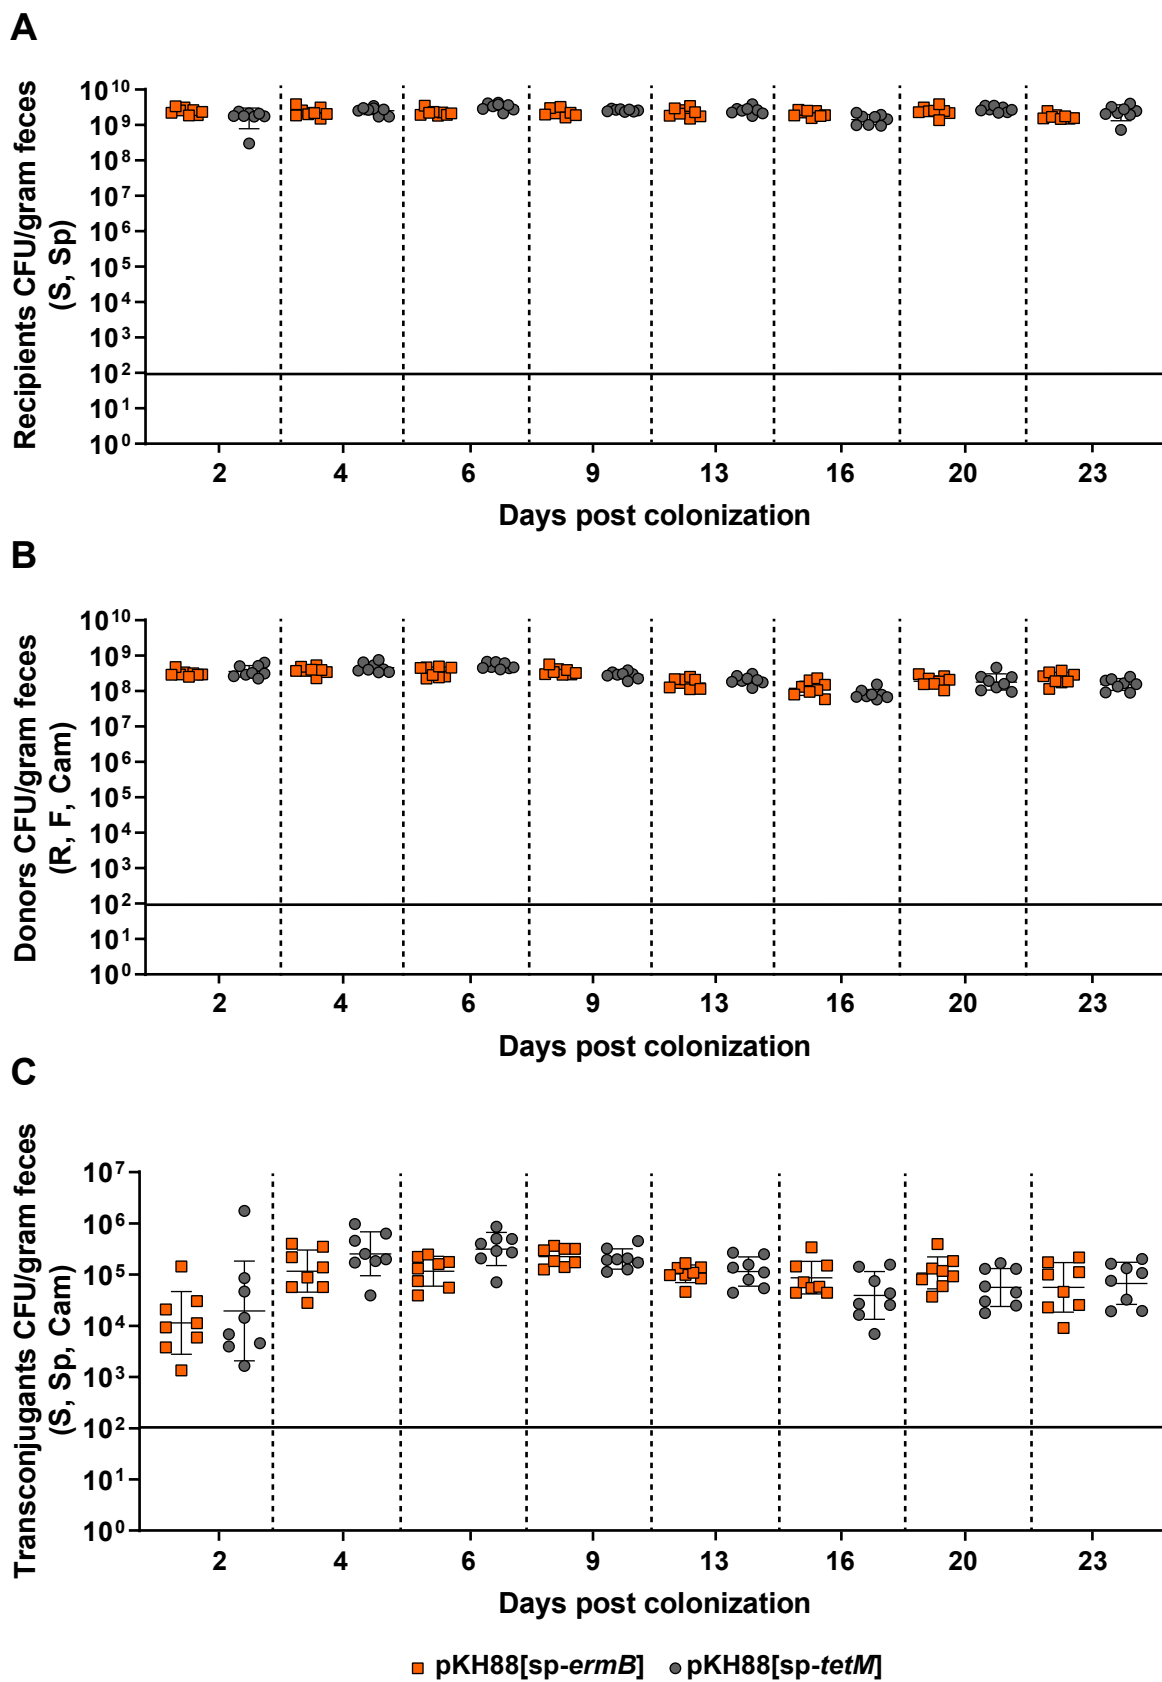

**Figure S5**

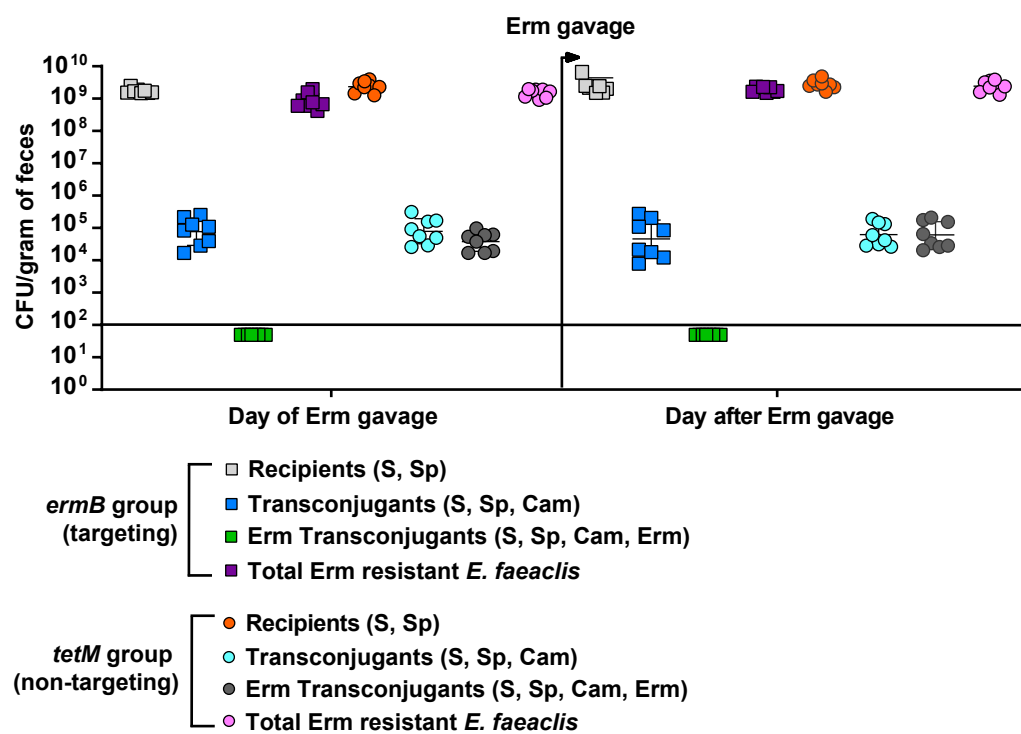

**Figure S6**

## Supplementary Figure Legends

**Figure S1. The allelic exchange vector pCOP88 integrates the  $P_{bacA}$ -cas9-cat-guide RNA module into pPD1.** pCOP88 derivatives contain elements from the allelic exchange vector pLT06 (1). These include a temperature sensitive *repA* (*repA<sup>ts</sup>*) allele that facilitates forced integration of pCOP88 derivatives into target DNA sequences under non-permissive temperature (42°C) and a *P-pheS* cassette that allows for the cellular utilization of *p*-chloro-phenylalanine as a counter-selectable marker. The *PbacA-cas9-cat*-guide RNA module is flanked by 1-kb pPD1 homology regions used for the homologous recombination of the module into native pPD1.

**Figure S2. *E. faecalis* V583 restricts conjugation of pKH88 derivatives originating from *E. faecalis* CK135.** (A) The ratio of *E. faecalis* V583 and OG1SSp transconjugants following *in vitro* co-culture with *E. faecalis* CK135(pKH88) derivative donors. (B) Comparison of normalized *E. faecalis* V583 transconjugant and *E. faecalis* V583 recipient numbers following *in vitro* co-culture with *E. faecalis* CK135(pKH88) derivative donors.

**Figure S3. Schematic cartoon of the antibiotic dysbiosis mouse model.**

**Figure S4. Intestinal colonization of *E. faecalis* populations following co-colonization with OG1SSp(pAM771) and CK135(pKH88) donors in antibiotic-treated mice.** (A) Recipients. (B) Donors. (C) Transconjugants. Markers; S – streptomycin, Sp – spectinomycin, R – rifampicin, F – fusidic acid, Cam – chloramphenicol.

**Figure S5. Intestinal colonization of *E. faecalis* populations following co-colonization with OG1SSp(pAM771) and CK135(pKH88) donors in gnotobiotic mice.** (A) Recipients. (B) Donors. (C) Transconjugants. The solid horizontal line indicates the limit of detection. Markers; S – streptomycin, Sp – spectinomycin, R – rifampicin, F – fusidic acid, Cam – chloramphenicol.

**Figure S6. Non-targeted *E. faecalis* intestinal transconjugant populations do not bloom following oral erythromycin treatment of gnotobiotic mice.** 27 days post co-colonization with *E. faecalis* OG1SSp(pAM771) and CK135(pKH88[sp-*ermB*]) (targeting group) or with *E. faecalis* OG1SSp(pAM771) and CK135(pKH88[sp-

*tetM*) (non-targeting group), mice received a single 40 µg dose of oral erythromycin. The number of recipients, transconjugants and erythromycin resistant transconjugants were enumerated from fecal pellets before and after oral erythromycin treatment. The solid horizontal line indicates the limit of detection. Markers; Erm – erythromycin, S – streptomycin, Sp – spectinomycin, Cam – chloramphenicol.

**Table S1. Strains used in this study**

| Organism           | Strain Name   | Description                                                                                                                                                                      | Ref        |
|--------------------|---------------|----------------------------------------------------------------------------------------------------------------------------------------------------------------------------------|------------|
| <i>E. coli</i>     | EC1000        | <i>E. coli</i> cloning host, providing <i>repA in trans</i> . F <sup>-</sup> , <i>araD139 (ara ABC-leu)7679, galU, galK, lacX74, rspL, thi, repA</i> of pWV01 in <i>glgB, km</i> | (2)        |
| <i>E. faecalis</i> | V583          | MDR bloodstream isolate, resistant to vancomycin, gentamicin, and erythromycin                                                                                                   | (3)        |
|                    | OG1SSp        | Spectinomycin-streptomycin-resistant derivative of OG1                                                                                                                           | (4)        |
|                    | CK135         | OG1 <i>rpoB<sub>H486Y</sub></i> (spontaneous Rif <sup>r</sup> derivative)                                                                                                        | (5)        |
|                    | CK135RF       | Spontaneous fusidic acid-resistant derivative of CK135                                                                                                                           | This study |
|                    | OG1RF ΔEfaRFI | OG1RF EfaRFI (OG1RF_11622-11621) deletion mutant                                                                                                                                 | (6)        |



**Table S2. Plasmids used in this study**

| Plasmid                  | Description                                                                                                            | Ref        |
|--------------------------|------------------------------------------------------------------------------------------------------------------------|------------|
| pLT06                    | Encodes temperature-sensitive <i>repA</i> and <i>pheS</i> *<br>counter-selection                                       | (1)        |
| pHA101                   | pLT06 + <i>oriT</i>                                                                                                    | (7)        |
| pCOP88[sp- <i>tetM</i> ] | pLT06 derivative used to knock in CRISPR-<br>targeting construct with a spacer targeting <i>tetM</i>                   | This study |
| pCOP88[sp- <i>ermB</i> ] | pLT06 derivative used to knock in CRISPR-<br>targeting construct with a spacer targeting <i>ermB</i>                   | This study |
| pKH88[sp- <i>ermB</i> ]  | ppD1 derivative with CRISPR-targeting cassette<br>for <i>ermB</i> ; also encodes <i>cat</i>                            | This study |
| pKH88[sp- <i>tetM</i> ]  | ppD1 derivative with CRISPR-targeting cassette<br>for <i>tetM</i> ; also encodes <i>cat</i>                            | This study |
| pAM771                   | Non-cytolytic derivative of the PRP pAD1<br>mutagenized with Tn917, encodes erythromycin<br>resistance via <i>ermB</i> | (8)        |
| pCF10                    | PRP; encodes tetracycline resistance via <i>tetM</i>                                                                   | (9)        |
| ppD1                     | PRP; encodes Bac-21 bacteriocin                                                                                        | (10)       |

**Table S3. Primers used in this study**

| Primer Name              | Sequence (5'-3')                                               | Use           |
|--------------------------|----------------------------------------------------------------|---------------|
| pCOP88 Ori for           | TGCAGCGTTTCTTTGAATAG                                           | Create pCOP88 |
| pCOP88 Ori rev           | GCTTTGCAAAGTCTGAAAAC                                           | Create pCOP88 |
| pCOP88 PheS cat for      | TGCCACCTTCGTTTTTCAGACTTTGCAAAGCCAA<br>GTAAAGGGATGCAGTTTAAAAATG | Create pCOP88 |
| pCOP88 PheS cat rev      | GGCATGATGGTTGCCGGTTCGATAAACCCAGCG<br>AAC                       | Create pCOP88 |
| pCOP88 cas9 for          | AAACATTACTCTATAGCAAACACAGTTAACCCAGC                            | Create pCOP88 |
| pCOP88 cas9-cat-PSRT rev | CAATATCAGAATCAATCCACTCCTGAATCCCATT<br>C                        | Create pCOP88 |
| pCOP88 Arm 1 for         | CTGGGTTTATCGACCGGCAACCATCATGCCTAA<br>ATTTTTATC                 | Create pCOP88 |
| pCOP88 Arm 1 rev         | GTAACTGTGTTTGCTATAGAGTAATGTTTTAAT<br>TTTTTTCTCTTTTTCAG         | Create pCOP88 |
| pCOP88 Arm 2 for         | GGATTCAGGAGTGGATTGATTCTGATATTGCCA<br>ATC                       | Create pCOP88 |
| pCOP88 Arm 2 rev         | CTAAAACGTCCTATTCAAAGAAACGCTGCAAGT<br>CAACTAGAATCTGCTG          | Create pCOP88 |
| cas9 rev                 | TTTATTAAAGTTCATCTAGTCGACAACTTTACGG<br>CGTGTTTC                 | Create pCOP88 |

|          |                                                         |               |
|----------|---------------------------------------------------------|---------------|
| cat for  | AAAGTTGTCGACTAGATGAACTTTAATAAAATTG<br>ATTTAGACAAT       | Create pCOP88 |
| cat rev  | TCAACAAACTGGCCCGTTTGTGAACTACTTTAT<br>AAAAGCCAGTCATTAGGC | Create pCOP88 |
| PSRT for | AGTAGTTCAACAAACGGGCC                                    | Create pCOP88 |

## References

1. Thurlow LR, Thomas VC, Hancock LE. 2009. Capsular polysaccharide production in *Enterococcus faecalis* and contribution of CpsF to capsule serospecificity. *J Bacteriol* 191:6203-10. doi:10.1128/JB.00592-09.
2. Leenhouts K, Buist G, Bolhuis A, Ten Berge A, Kiel J, Mierau I, Dabrowska M, Venema G, Kok J. 1996. A general system for generating unlabelled gene replacements in bacterial chromosomes. *Mol Gen Genet* 253:217-224. doi:10.1007/s004380050315.
3. Sahm DF, Kissinger J, Gilmore MS, Murray PR, Mulder R, Solliday J, Clarke B. 1989. In vitro susceptibility studies of vancomycin-resistant *Enterococcus faecalis*. *Antimicrob Agents Chemother* 33:1588-91. doi:10.1128/aac.33.9.1588.
4. Dunny GM, Brown BL, Clewell DB. 1978. Induced cell aggregation and mating in *Streptococcus faecalis*: evidence for a bacterial sex pheromone. *Proc Natl Acad Sci USA* 75:3479-3483. doi:10.1073/pnas.75.7.3479.
5. Kristich CJ, Little JL. 2012. Mutations in the beta subunit of RNA polymerase alter intrinsic cephalosporin resistance in enterococci. *Antimicrob Agents Chemother* 56:2022-7. doi:10.1128/AAC.06077-11.

6. Huo W, Adams HM, Trejo C, Badia R, Palmer KL. 2019. A type I restriction-modification system associated with *Enterococcus faecium* subspecies separation. *Appl Environ Microbiol* 85:e02174-18. doi:10.1128/AEM.02174-18.
7. Bhardwaj P, Ziegler E, Palmer KL. 2016. Chlorhexidine induces VanA-type vancomycin resistance genes in enterococci. *Antimicrob Agents Chemother* 60:2209-21. doi:10.1128/AAC.02595-15.
8. Ike Y, Clewell DB. 1984. Genetic analysis of the pAD1 pheromone response in *Streptococcus faecalis*, using transposon Tn917 as an insertional mutagen. *J Bacteriol* 158:777-783.
9. Dunny G, Funk C, Adsit J. Direct stimulation of the transfer of antibiotic resistance by sex pheromones in *Streptococcus faecalis*. *Plasmid* 6:270-278.
10. Fujimoto S, Tomita H, Wakamatsu E, Tanimoto K, Ike Y. 1995. Physical mapping of the conjugative bacteriocin plasmid pPD1 of *Enterococcus faecalis* and identification of the determinant related to the pheromone response. *J Bacteriol* 177:5574-5581. doi:10.1128/jb.177.19.5574-5581.1995.
